# Supplementary material for: Alkaline-assisted Ni nanocatalysts with largely enhanced low-temperature activity toward CO2 methanation
Source: Royal Society of Chemistry journal article supplement (doi:10.1039/c5cy02026c), 2016-01-01
Supplement: c5cy02026c1.pdf [file c5cy02026c1.pdf]

Supporting Information for

**Alkaline-assisted Ni nanocatalysts with largely enhanced low-  
temperature activity toward CO<sub>2</sub> methanation**

Jie Liu,<sup>a</sup> Weihan Bing,<sup>a</sup> Xiaoge Xue,<sup>a</sup> Fei Wang,<sup>a</sup> Bin Wang,<sup>b</sup> Shan He,<sup>\*a</sup> Yingkui Zhang,<sup>a</sup>  
Min Wei<sup>\*a</sup>

<sup>a</sup> State Key Laboratory of Chemical Resource Engineering, Beijing University of Chemical  
Technology, Beijing 100029, P. R. China

<sup>b</sup> Beijing Research Institute of Chemical Industry, Sinopec Group, Beijing 100013, P. R. China

\* Corresponding authors. Tel: +86-10-64412131; Fax: +86-10-64425385.

E-mail addresses: vh30@163.com (S. He); weimin@mail.buct.edu.cn (M. Wei).

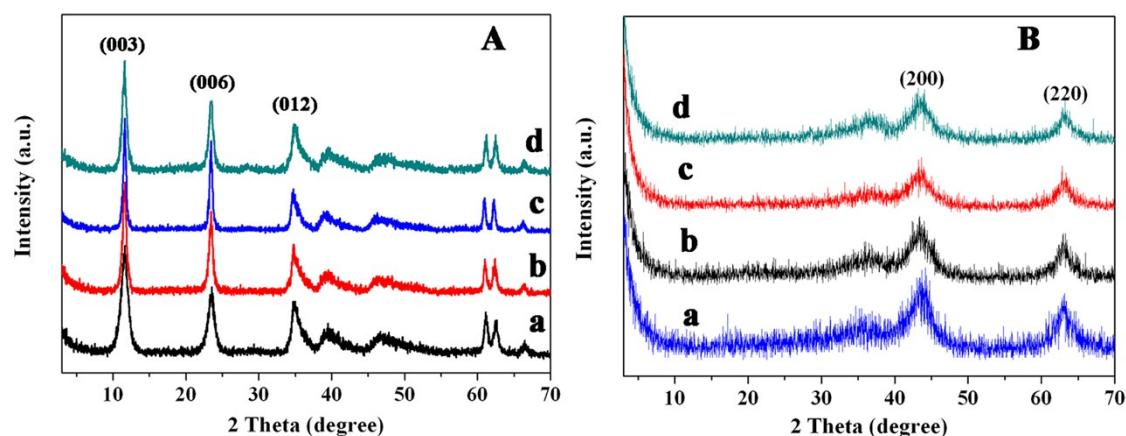

**Figure S1.** (A) XRD patterns of the Ni<sub>x</sub>Mg<sub>2-x</sub>Al-LDH precursors: (a) Ni<sub>0.4</sub>Mg<sub>1.6</sub>Al-LDH, (b) Ni<sub>0.8</sub>Mg<sub>1.2</sub>Al-LDH, (c) NiMgAl-LDH and (d) Ni<sub>1.6</sub>Mg<sub>0.4</sub>Al-LDH. (B) XRD patterns of the Ni<sub>x</sub>/Mg<sub>2-x</sub>Al-MMO samples: (a) Ni<sub>0.4</sub>/Mg<sub>1.6</sub>Al-MMO, (b) Ni<sub>0.8</sub>/Mg<sub>1.2</sub>Al-MMO, (c) Ni/MgAl-MMO and (d) Ni<sub>1.6</sub>/Mg<sub>0.4</sub>Al-MMO.

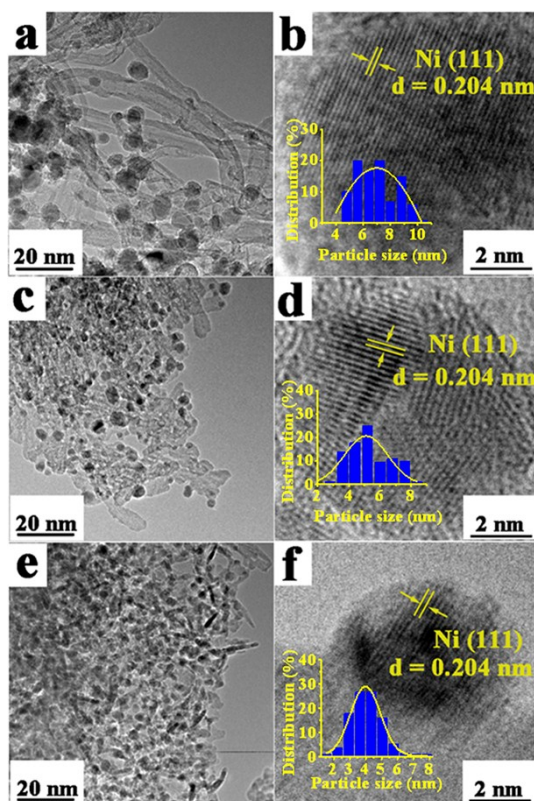

**Figure S2.** HRTEM images of various Ni-based catalysts prepared by the impregnation method: (a, b) Ni/CNT, (c, d) Ni/Al<sub>2</sub>O<sub>3</sub>, (e, f) Ni/MgO.

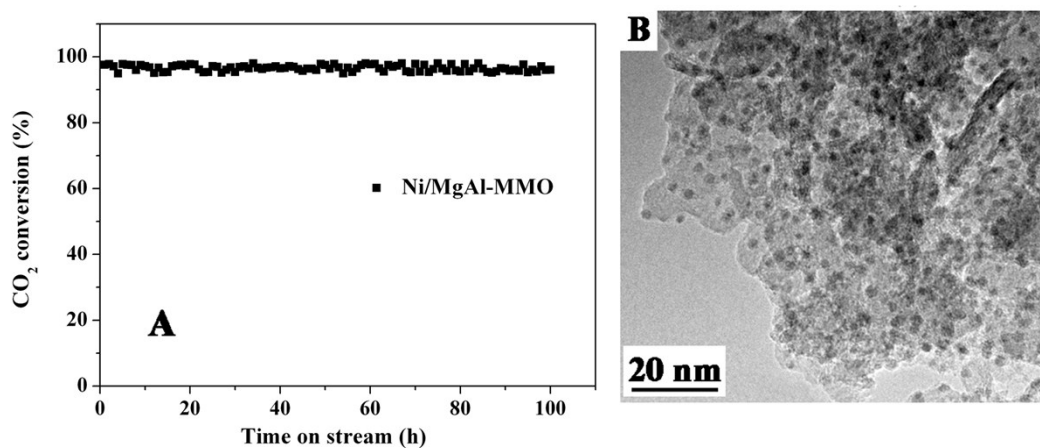

**Figure S3.** (A) CO<sub>2</sub> conversion vs. reaction time over the Ni/MgAl-MMO catalyst at 250 °C. (B) TEM image of the Ni/MgAl-MMO catalyst after reaction for 100 h on stream.
